# Supplementary material for: The CCR4-NOT Complex Physically and Functionally Interacts with TRAMP and the Nuclear Exosome
Source: PLoS One. 2009 Aug 25;4(8):e6760. doi: 10.1371/journal.pone.0006760 (PMC2727002; doi:10.1371/journal.pone.0006760)
Supplement: Table S1 — The results of the micro-array analyses for all of the snRNAs and snoRNAs present on the ChIPs are indicated, as well as a description of the types of snoRNAs as obtained from the yeast snoRNA database at US Amherst (http://people.biochem.umass.edu/fournierlab/snornadb/main.php). (0.03 MB XLS) [file pone.0006760.s008.xls]

## Sheet: Sheet1
Coef.caf1.1 - WT.1	Coef.caf130.1 - WT.1	Coef.ccr4.1 - WT.1	Coef.not2.1 - WT.1	Coef.not3.1 - WT.1	Coef.not4.1 - WT.1	Coef.not5.1 - WT.1	p.value.caf1.1 - WT.1	p.value.caf130.1 - WT.1	p.value.ccr4.1 - WT.1	p.value.not2.1 - WT.1	p.value.not3.1 - WT.1	p.value.not4.1 - WT.1	p.value.not5.1 - WT.1	caf1	caf130	ccr4	not2	not3	not4	not5	ORF	origin	type	target	Process
0.33624	0.70367	0.74379	1.70035	0.11285	0.9491	1.61527	0.719709	0.43397	0.318765	0.009632	0.925112	0.28232	0.0861005	0	0	0	1	0	0	0	SNR11	mono	H/ACA	25S	Y
0.6531	0.6573	0.84424	1.81663	-0.36353	2.23301	2.43266	0.389983	0.428088	0.210924	0.0039329	0.688516	0.009119	0.0051083	0	0	0	1	0	1	1	U14	poly	C/D	18S	C,M
0.23562	0.18047	0.21735	0.01258	-0.13439	0.34499	1.43003	0.786426	0.839872	0.782477	0.986955	0.899398	0.695502	0.0849101	0	0	0	0	0	0	0	SNR13	mono	C/D	25S	M
0.02576	1.06617	1.73479	1.97226	0.67801	0.66992	2.84232	0.979374	0.211001	0.0134304	0.0022035	0.379402	0.417698	0.0014014	0	0	1	1	0	0	1	SNR3	mono	H/ACA	25S	Y
1.32318	1.30565	0.64505	0.14943	0.57128	1.50295	0.23598	0.0646504	0.123265	0.351153	0.820403	0.478738	0.0646855	0.857536	0	0	0	0	0	0	0	SNR33	mono	H/ACA	25S	Y
0.09571	0.59322	0.77639	1.67301	-0.2971	1.11278	2.06644	0.904891	0.366708	0.156818	0.001433	0.678361	0.0872777	0.0032236	0	0	0	1	0	0	1	SNR34	mono	H/ACA	25S	Y
-0.04777	0.29328	0.4901	1.14257	-0.61254	0.27615	2.07877	0.963946	0.770566	0.544716	0.0683777	0.49304	0.797496	0.0288772	0	0	0	0	0	0	1	SNR35	mono	H/ACA	18S	Y
1.0765	0.98971	1.14516	-0.07796	0.41975	1.38316	0.88404	0.0497446	0.124292	0.029088	0.883276	0.497201	0.0278566	0.202376	1	0	1	0	0	1	0	SNR36	mono	H/ACA	18S	Y
-0.19844	0.33303	1.16495	1.6202	-0.01477	0.20704	2.09837	0.734613	0.536359	0.0135883	0.0004516	0.985141	0.742323	0.0005726	0	0	1	1	0	0	1	SNR37	mono	H/ACA	25S	Y
-0.45544	-0.57883	0.78721	0.38212	-0.87074	-0.8335	1.02003	0.533315	0.445791	0.205621	0.480807	0.198516	0.264259	0.226198	0	0	0	0	0	0	0	SNR38	intron	C/D	25S	M
0.62143	-0.02047	1.13743	0.48263	-0.627	0.15053	0.51597	0.365632	0.981067	0.070067	0.354203	0.372197	0.867798	0.59854	0	0	0	0	0	0	0	SNR39	intron	C/D	25S	M
-0.17239	-0.05674	1.36993	-1.47253	-0.46178	0.35182	0.5784	0.867715	0.959751	0.06837	0.0207041	0.626395	0.727293	0.625338	0	0	0	-1	0	0	0	SNR39b	mono	C/D	25S	M
-0.30756	-0.11793	-0.27933	0.84212	-1.35684	0.37109	1.33946	0.694077	0.895626	0.694902	0.102551	0.0520852	0.651949	0.0924691	0	0	0	0	0	0	0	SNR4	mono	C/D	Nr	Nr
0.05268	0.55637	0.98164	0.27866	0.41857	0.80333	0.68942	0.96333	0.536359	0.196872	0.685412	0.674702	0.382257	0.556876	0	0	0	0	0	0	0	SNR41	poly	C/D	18S	M
0.61884	-0.13473	1.49769	-0.0159	0.32011	2.24177	1.13244	0.391599	0.884092	0.0234608	0.982493	0.713338	0.0067384	0.187934	0	0	1	0	0	1	0	SNR42	mono	H/ACA	25S	Y
0.36154	0.43021	1.33994	0.18841	-0.2846	0.96791	0.74397	0.596639	0.525662	0.0229408	0.718959	0.713537	0.154371	0.359288	0	0	1	0	0	0	0	SNR43	mono	H/ACA	5.8S, 25S	Y
1.00645	0.60665	2.04295	-0.6541	-0.03544	-1.45633	-0.95326	0.0709518	0.342566	0.0004376	0.137451	0.968824	0.0240193	0.173062	0	0	1	0	0	-1	0	SNR44	intron	H/ACA	18S, 25S	Y
0.81659	0.37173	1.36343	2.51212	-0.40368	1.82024	3.23502	0.201676	0.614729	0.0244927	8.92e-05	0.585839	0.0134483	0.0001545	0	0	1	1	0	1	1	SNR45	mono	C/D	Nr	Nr
-0.39579	-0.19095	0.03827	-0.93133	-0.23319	-0.17251	-0.1382	0.598328	0.82833	0.965704	0.0767965	0.797839	0.852602	0.911285	0	0	0	0	0	0	0	SNR46	mono	H/ACA	25S	Y
0.71624	-0.03415	1.15372	0.50745	-0.28169	1.5057	2.38068	0.495183	0.979199	0.202272	0.521203	0.831968	0.160603	0.038691	0	0	0	0	0	0	1	SNR48	mono	C/D	25S	M
0.12047	0.00453	0.55959	0.17645	-0.3357	0.5456	1.51872	0.901246	0.996456	0.407127	0.77215	0.702187	0.506262	0.0675943	0	0	0	0	0	0	0	SNR5	mono	H/ACA	25S	Y
0.75979	0.55692	1.19745	0.26441	0.37898	0.98898	0.86124	0.180699	0.388966	0.0264501	0.573945	0.561132	0.117664	0.23101	0	0	1	0	0	0	0	SNR50	mono	C/D	25S	M
1.28505	1.02371	1.20481	0.28053	0.85068	0.71783	0.44223	0.0699931	0.223972	0.0791822	0.640186	0.245392	0.37831	0.703279	0	0	0	0	0	0	0	SNR51	poly	C/D	18S, 25S	M
0.68294	0.33405	1.99097	0.05301	-0.39133	0.23739	1.11965	0.378756	0.70507	0.0057163	0.940305	0.668493	0.813249	0.233753	0	0	1	0	0	0	0	SNR54	intron	C/D	18S	M
1.13151	0.88139	1.63107	0.69191	0.1222	1.33392	1.17886	0.0397598	0.181282	0.0028392	0.106115	0.883675	0.0319607	0.0731829	1	0	1	0	0	1	0	SNR55	poly	C/D	18S	M
0.8491	0.1235	0.65168	0.86161	-0.04351	0.43389	1.83014	0.176462	0.883401	0.267895	0.0793122	0.966301	0.563506	0.0147276	0	0	0	0	0	0	1	SNR56	mono	C/D	18S	M
1.00547	0.6846	1.63694	1.59737	0.06631	-0.52535	1.4818	0.0534639	0.263151	0.0018525	0.0009397	0.932048	0.37862	0.0184438	0	0	1	1	0	0	1	SNR59	intron	C/D	25S	M
-0.64379	-0.34558	0.66683	0.42107	-0.85335	-0.60099	1.08932	0.208155	0.538938	0.162847	0.289312	0.103218	0.290815	0.0731782	0	0	0	0	0	0	0	SNR60	mono	C/D	25S	M
0.85123	0.25195	0.36592	0.31522	0.08359	0.4288	0.49461	0.0802631	0.66406	0.448234	0.422197	0.911352	0.45066	0.471893	0	0	0	0	0	0	0	SNR61	poly	C/D	25S	M
-0.03965	-0.22357	-0.05268	-1.67624	-1.98223	-0.68482	-0.19845	0.96333	0.774981	0.948199	0.0023531	0.0070243	0.326325	0.861121	0	0	0	-1	-1	0	0	SNR63	mono	C/D	25S	M
0.89634	0.44967	-0.07304	0.19435	0.46401	0.58688	0.99365	0.227499	0.59489	0.940068	0.761924	0.590104	0.496368	0.295993	0	0	0	0	0	0	0	SNR66	mono	C/D	25S	M
1.61517	0.88621	1.91568	-0.04637	0.72405	1.3482	0.74838	0.0084117	0.198998	0.0009457	0.933782	0.213964	0.03734	0.320477	1	0	1	0	0	1	0	SNR67	poly	C/D	25S	M
1.18318	0.36289	1.30433	-0.17896	1.00922	2.7222	0.63935	0.118535	0.689528	0.0732788	0.790919	0.193204	0.0040816	0.562545	0	0	0	0	0	1	0	SNR68	mono	C/D	25S	M
-0.16244	0.09479	1.43176	-0.17161	-0.41096	0.51788	1.66022	0.846474	0.913669	0.0186699	0.756216	0.574614	0.48261	0.0259719	0	0	1	0	0	0	1	SNR69	mono	C/D	25S	M
0.28991	0.93415	0.8641	0.1112	0.54941	1.78788	0.67262	0.701508	0.212492	0.153404	0.849142	0.42844	0.015442	0.44342	0	0	0	0	0	1	0	SNR70	poly	C/D	18S	M
1.33695	0.79322	1.52219	1.62554	0.14619	2.03385	2.13442	0.0130154	0.201407	0.0031895	0.0007615	0.840323	0.0019764	0.0009326	1	0	1	1	0	1	1	SNR71	mono	C/D	25S	M
2.19699	0.6873	1.57292	1.28684	0.10667	2.57398	1.96062	0.014716	0.486579	0.060269	0.0608588	0.933178	0.0113801	0.0604058	1	0	0	0	0	1	0	SNR72	poly	C/D	25S	M
1.78342	0.70635	2.23503	0.74739	0.85718	2.51507	1.82605	0.0294309	0.444995	0.0045983	0.239687	0.31473	0.0088038	0.0591226	1	0	1	0	0	1	0	SNR73	poly	C/D	25S	M
0.99874	0.15709	1.55192	0.31988	1.43916	2.06539	0.93295	0.12145	0.852098	0.0134304	0.548384	0.0413619	0.0073862	0.258744	0	0	1	0	1	1	0	SNR74	poly	C/D	18S	M
1.584	0.56195	1.32036	-0.47119	0.33741	2.23428	0.25821	0.0160192	0.442386	0.0306535	0.353857	0.669642	0.00482	0.809263	1	0	1	0	0	1	0	SNR75	poly	C/D	25S	M
1.20852	0.09307	1.37798	-0.35336	-0.89966	1.42495	0.89075	0.0402931	0.90985	0.016274	0.459738	0.138011	0.0326275	0.234587	1	0	1	0	0	1	0	SNR76	poly	C/D	25S	M
0.77033	0.40037	1.348	0.57643	0.7197	1.43112	1.24292	0.313911	0.644875	0.0573953	0.3238	0.362726	0.0853868	0.177665	0	0	0	0	0	0	0	SNR77	poly	C/D	18S	M
0.28099	0.80154	1.00116	1.6432	0.46263	0.8732	1.84142	0.73327	0.301354	0.122081	0.0052153	0.556139	0.254268	0.0233487	0	0	0	1	0	0	1	SNR8	mono	H/ACA	25S	Y
0.19644	0.89501	0.84354	1.24973	0.18635	1.47226	2.00021	0.711436	0.0908236	0.0455909	0.0017985	0.744313	0.005802	0.0003938	0	0	1	1	0	1	1	SNR9	mono	H/ACA	25S	Y
0.4318	0.45093	0.67832	1.24375	-0.35665	1.60233	1.59675	0.473579	0.478165	0.196978	0.0082932	0.586415	0.0138362	0.0171046	0	0	0	1	0	1	1	U4		snRNA
2.41492	1.72497	1.46769	2.53318	0.91334	1.32337	2.1096	0.0496008	0.233836	0.204764	0.0130827	0.514446	0.345106	0.170021	1	0	0	1	0	0	0	U6		snRNA
Table S1.
