# Supplementary material for: The CCR4-NOT Complex Physically and Functionally Interacts with TRAMP and the Nuclear Exosome
Source: PLoS One. 2009 Aug 25;4(8):e6760. doi: 10.1371/journal.pone.0006760 (PMC2727002; doi:10.1371/journal.pone.0006760)
Supplement: Table S2 — List of the peptides identified by mass spectrometry with scores for identified proteins. (0.03 MB XLS) [file pone.0006760.s009.xls]

## Sheet: Sheet1
	Rrp41 TT caf40delta				Rrp41 TT wt				Rrp41 TT not4delta
	Protein	score	Peptides		Protein	score	Peptides		Protein	score	Peptides
	Rrp40	66	21-47		Rrp40	66	21-47		Rrp40	66	21-47
			50-63				108-122				108-122
			108-122				109-122				109-122
			109-122				123-143				123-143
			123-143				129-143				129-143
			129-143				165-176				194-209
			198-209				198-209				198-209
	Rrp46	62	38-56		Rrp46	69	38-56		Rrp46	77	38-56
			40-56				40-56				40-56
			72-80				72-80				72-80
			156-172				86-107				86-107
			202-210				156-172				156-172
			211-220				176-201				202-210
			212-220				212-220				211-220
											212-220
	Mtr3	127	9 to 30		Mtr3	82	39-65
			9 to 31				66-81		Mtr3	111	9 to 31
			39-65				112-129				39-65
			66-81				133-159				66-81
			85-98				206-229				85-98
			112-129				216-229				112-129
			133-159				230-236				133-159
			206-229				237-250				206-229
			216-229								216-229
			230-236		Rrp42	43	9 to 26				230-236
			237-250				27-49				237-250
							66-86
	Rrp42	56	9 to 26				87-101		Rrp42	56	9 to 26
			27-49				157-179				27-49
			64-86								64-86
			66-86		Csl4	44	43-51				66-86
			87-101				52-65				87-101
			157-179				218-231				157-179
							220-231
	Csl4	48	16-42				232-249		Csl4	48	16-42
			43-51				250-258				43-51
			52-65								52-65
			218-231		Rrp41	47	4 to 13				218-231
			220-231				19-24				220-231
			232-249				96-106				232-249
			250-258				111-119				250-258
							196-209
	Rrp41	69	4 to 13				205-223		Rrp41	69	4 to 13
			19-24								19-24
			24-48		Rrp4	89	48-69				24-48
			96-106				70-90				96-106
			97-106				104-115				97-106
			111-119				132-149				111-119
			196-209				165-187				196-209
			205-223				196-209				205-223
			210-223				256-271				210-223
							272-294
	Rrp4	63	70-90				306-318		Rrp4	73	70-90
			104-115				319-353				104-115
			132-149								132-149
			165-187		Rrp43	39	25-33				152-164
			196-209				34-44				165-187
			256-271				45-50				196-209
			306-318				51-61				212-234
			319-353				155-163				256-271
							178-204				306-318
							223-242				339-353
	Rrp43	58	2 to 24		Rrp6	65	1 to 12		Rrp43	102	2 to 24
			25-33				136-153				25-33
			34-44				154-167				34-44
			45-50				234-245				45-50
			46-61				246-259				46-61
			51-61				270-288				51-61
			120-138				289-302				105-138
			155-163				326-339				120-138
							343-350				155-163
	Rrp6	123	136-153				364-377				178-204
			154-167				406-421				223-242
			234-245				427-438
			246-259				444-449		Rrp6	140	109-1221
			270-288				529-543				136-153
			272-288				684-697				154-167
			289-302								234-245
			326-339		Rrp44	223	125-131				246-259
			343-350				145-160				270-288
			344-350				176-199				289-302
			364-377				177-199				303-319
			406-421				217-232				326-339
			427-438				248-263				343-350
			444-449				270-294				364-377
			529-543				449-469				386-394
			684-697				462-469				406-421
							470-497				427-438
	Rrp44	258	55-69				601-621				444-449
			145-160				648-660				529-543
			176-199				650-660				684-697
			177-199				688-702
			217-232				720-740		Rrp44	209	125-131
			248-263				741-753				145-160
			270-294				742-753				176-199
			449-469				754-773				177-199
			462-469				755-773				217-232
			470-497				793-806				248-263
			558-590				831-847				270-294
			601-621				857-872				449-469
			648-660				897-908				462-469
			650-660				933-940				470-497
			688-702				960-971				601-621
			741-753				972-984				648-660
			742-753								650-660
			754-773								720-740
			755-773								741-753
			793-806								742-753
			812-830								754-773
			831-847								755-773
			857-872								793-806
			897-908								831-847
			933-940								857-872
			960-971								897-908
			972-984								933-940
											960-971
	Not5	101	6 to 12								972-984
			76-83
			85-92						Not5	145	6 to 12
			108-117								19-30
			141-156								31-42
			171-189								76-83
			299-314								85-92
			317-332								108-117
			424-444								141-156
			456-462								157-169
			527-533								171-189
											299-314
											317-332
											368-379
											424-444
											456-462
											502-507
											527-533
	Table S2.
