# Supplementary material for: The CCR4-NOT Complex Physically and Functionally Interacts with TRAMP and the Nuclear Exosome
Source: PLoS One. 2009 Aug 25;4(8):e6760. doi: 10.1371/journal.pone.0006760 (PMC2727002; doi:10.1371/journal.pone.0006760)
Supplement: Table S3 — List of the peptides identified by mass spectrometry with scores for identified proteins. (0.03 MB XLS) [file pone.0006760.s010.xls]

## Sheet: Sheet1
	Not5 TT				Not2 TT caf40delta				NOT4 TT caf40delta				Caf130 TT caf40delta
	Protein	score	Peptides		Protein	score	Peptides		Protein	score	Peptides		Protein	score	Peptides
	Not1	63	1 to 19		Not1	57	1 to 19		Not1	56	1 to 19		Not1	138	171-186
			160-170				171-186				171-186				223-236
			171-186				223-236				223-236				223-242
			223-236				223-242				223-242				314-330
			223-242				398-405				398-405				398-405
			398-405				549-558				549-558				549-558
			446-460				677-685				677-685				608-623
			549-558				723-732				723-732				677-685
			617-623				1256-1265				1256-1265				1017-1034
			677-685				1513-1527				1471-1478				1209-1224
			723-732				1761-1768				1513-1527				1231-1255
			766-783				1963-1981				1761-1768				1256-1265
			1209-1224				1982-1993				1953-1962				1420-1438
			1256-1265				2020-2028				1963-1981				1471-1478
			1471-1478								1982-1993				1513-1527
			1513-1527		Mtr4	63	26-41				2020-2028				1572-1581
			1533-1547				50-60								1679-1694
			1761-1768				76-91		Mtr4	46	26-41				1695-1707
			1953-1962				273-286				42-49				1761-1768
			1963-1981				356-374				50-60				1952-1962
			1982-1993				406-416				76-91				1963-1981
			2020-2028				429-437				273-286				2012-2028
							631-644				356-374				2020-2028
	Rrp44	113	55-69				662-678				406-416
			125-131				816-823				429-437		Caf130	44	180-188
			161-169				835-845				631-644				189-207
			217-232				846-852				662-678				543-554
			233-247				1016-1026				816-823				621-631
			462-469								835-845				745-755
			470-497		NOT5	45	141-156				846-852				804-821
			499-511				157-169				1016-1026				822-832
			650-660				170-189								1048-1069
			661-675				294-314		Not5	54	141-156				1070-1086
			688-702				299-315				157-169				1070-1087
			742-753				317-332				170-189
			755-773				339-360				171-189		Not5	216	19-42
			775-774				424-444				317-332				31-42
			793-806								339-360				74-83
			849-856		NOT2	79	19-45				424-444				126-140
			933-940				46-51				546-560				141-156
			960-971				52-65								141-169
							104-118		Not4	268	133-158				157-169
	Not3	62	203-268				119-133				177-205				170-189
			291-317				150-165				178-205				226-237
			359-402				166-175				178-210				317-332
			457-498				182-191				271-317				339-360
			600-631								285-317				361-367
			702-721		RRP41	78	4 to 13				285-361				368-379
							19-24				318-361				527-533
	Not5	44	141-156				24-48				318-406
			157-169				70-80				362-406		Not2	66	52-65
			171-189				96-106				362-407				119-133
			299-314				97-106				418-442				119-134
			317-332				111-119				475-520				150-165
			339-360				196-209				483-520				166-175
			424-444				210-223				483-527				166-178
							226-233				521-554				182-191
	Rrp41	78	4 to 13								528-554
			19-24		RRP42	34	9 to 26				528-568		Rrp41	82	19-24
			24-48				27-49				555-581				24-48
			70-80				66-86								25-48
			96-106				157-179		Rrp41	89	4 to 13				107-119
			97-106								19-24				196-209
			111-119								24-48				205-223
			196-209								70-80				210-223
			210-223								96-106				224-233
			226-233								97-106
											111-119		Rrp42	83	9 to 26
											196-209				27-49
											210-223				87-101
											226-233				102-113
															228-245
									Rrp42	31	9 to 26				238-253
											27-49				246-253
											66-86				246-260
											157-179
	Table S3.
